# Supplementary material for: Core–shell nanostructures introduce multiple potential barriers to enhance energy filtering for the improvement of the thermoelectric properties of SnTe
Source: Royal Society of Chemistry journal article supplement (doi:10.1039/c9nr09331a), 2019-12-20
Supplement: c9nr09331a1.pdf [file c9nr09331a1.pdf]

## Supporting Information

### Core-shell nanostructures introduce multiple potential barriers to enhance energy filtering for the improvement of thermoelectric properties of SnTe

Zheng Ma,<sup>a</sup> Chao Wang,<sup>\*a</sup> Jingdan Lei,<sup>a</sup> De Zhang,<sup>a</sup> Yanqun Chen,<sup>a</sup> Yuanxu Wang,<sup>a</sup>  
Jianli Wang,<sup>\*a</sup> and Zhenxiang Cheng<sup>\*ab</sup>

<sup>a</sup>Institute for Computational Materials Science,  
School of Physics and Electronics  
Henan University,  
Kaifeng, 475004, China

E-mail: wangchao@vip.henu.edu.cn (Chao Wang), jianli@uow.edu.au (Jianli Wang)

<sup>b</sup>Institute for Superconducting and Electronic Materials,  
University of Wollongong,  
Squires Way, North Wollongong, 2522, Australia  
E-mail: cheng@uow.edu.au (Zhenxiang Cheng)

### Results and Discussion :

In our work, the Lorenz number is obtained based on the two band model:

$$L_{lh} = \left( \frac{\kappa_B}{e} \right)^2 \left[ \frac{{}^2F_{-2}^1(\eta, \alpha)}{{}^0F_{-2}^1(\eta, \alpha)} - \left( \frac{{}^1F_{-2}^1(\eta, \alpha)}{{}^0F_{-2}^1(\eta, \alpha)} \right)^2 \right], \quad (1)$$

and

$$L_{hh} = \left( \frac{\kappa_B}{e} \right)^2 \left[ \frac{{}^2F_{-2}^1(\eta - \Delta v, 0)}{{}^0F_{-2}^1(\eta - \Delta v, 0)} - \left( \frac{{}^1F_{-2}^1(\eta - \Delta v, 0)}{{}^0F_{-2}^1(\eta - \Delta v, 0)} \right)^2 \right], \quad (2)$$

In the equations above the integral  ${}^nF_l^m$  is defined by

$${}^nF_l^m = \int_0^\infty -\frac{\partial f}{\partial \varepsilon} \varepsilon^n (\varepsilon + \alpha \varepsilon^2)^m \left[ (1 + 2\alpha \varepsilon)^2 + 2 \right]^{\frac{l}{2}} d\varepsilon,$$

where  $L_{lh}$  is the L of light-hole band,  $L_{hh}$  is the L of heavy-hole band,  $\eta$  is the reduced chemical potential calculated by  $\eta = E_f/k_B T$ ,  $\alpha$  is the nonparabolic parameter obtained by  $\alpha = k_B T/E_g$ , and  ${}^nF_l^m$  is the generalized Fermi function. For the second valence band, we set  $\alpha = 0$  and replace  $\eta$  with  $\eta - \Delta v$  in these equations, where  $\Delta v = \Delta E/k_B T$ ,  $\Delta E$  is the energy difference between the first and second valence band. The total L of the

system can be expressed:

$$L_{\text{total}} = (\delta_{lh} L_{lh} + \delta_{hh} L_{hh}) / (\delta_{lh} + \delta_{hh}). \quad (3)$$

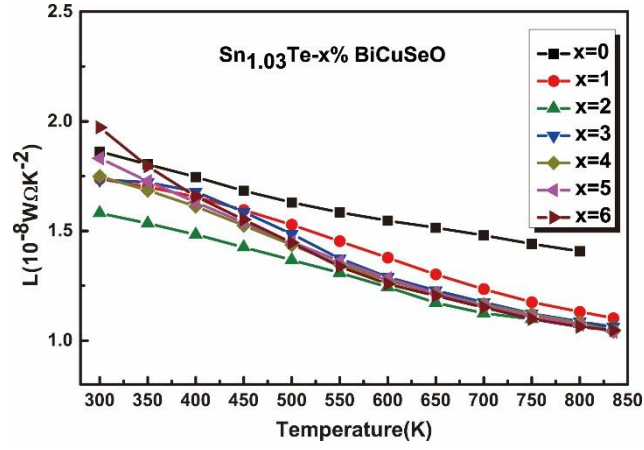

**Figure S1.** Lorenz numbers as a function of temperature for  $\text{Sn}_{1.03}\text{Te-x}\% \text{BiCuSeO}$ .
